# Supplementary material for: Long ncRNA A-ROD activates its target gene DKK1 at its release from chromatin
Source: PubMed Central journal article supplement (PMC5915440; doi:10.1038/s41467-018-04100-3), 2018-04-24
Supplement: 41467_2018_4100_MOESM1_ESM.pdf [file 41467_2018_4100_MOESM1_ESM.pdf]

**Long ncRNA A-ROD activates its target gene DKK1 at its release from chromatin**

**Ntini et al.**

**Supplementary Information contains:**

**Supplementary Figures 1-9**

**Supplementary Tables 1-2**

# Supplementary Figure 1

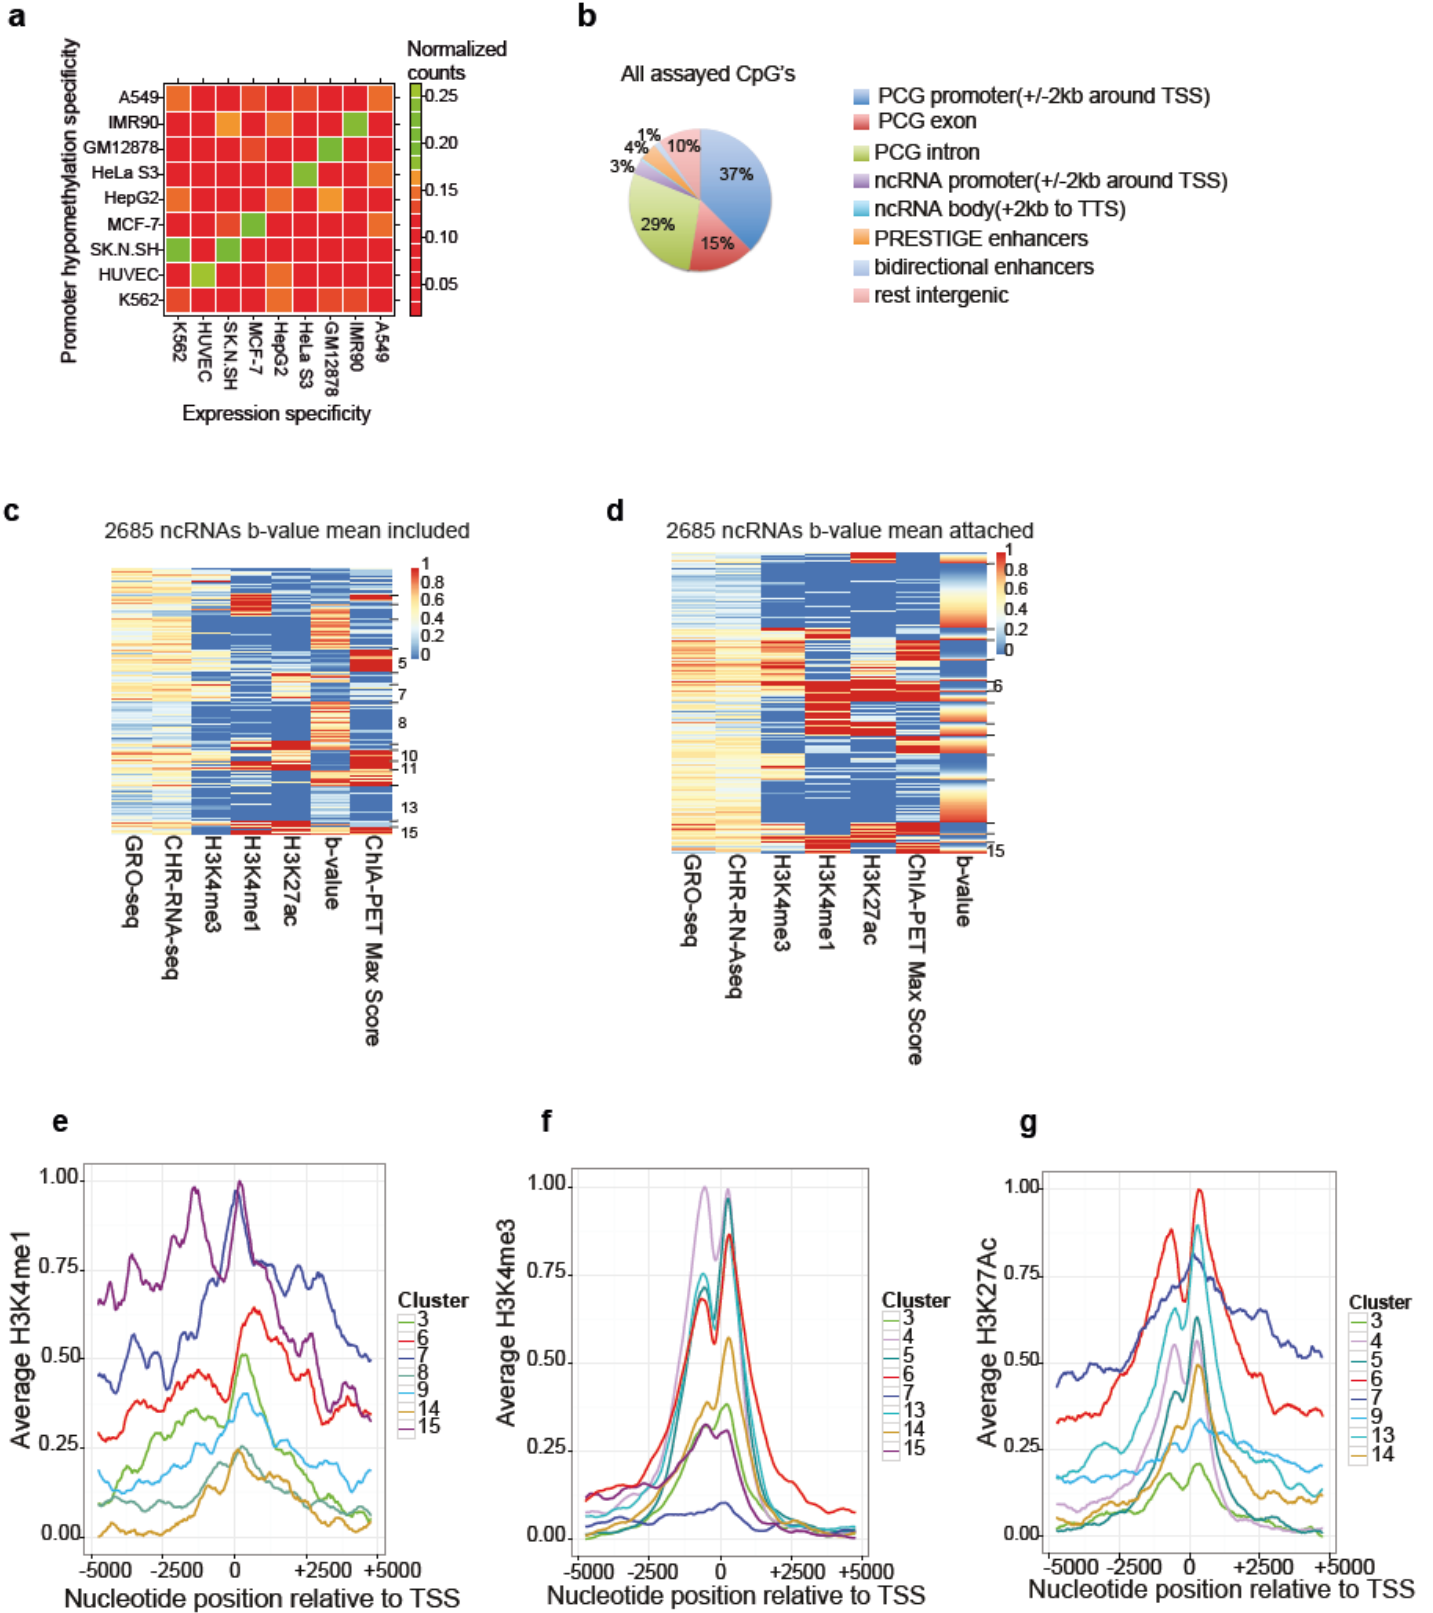

### **Supplementary Figure 1: Grouping of long ncRNAs based on expression and epigenetic marks**

**(a)** Heatmap showing correspondence (normalized counts; observed/expected counts for each cell-type combination) between long ncRNA expression specificity (extracted from ENCODE available nuclear polyA<sup>+</sup> RNA-seq data) and associated promoter hypomethylation cell-type specificity (extracted from the ENCODE Methyl 450K Array b-values, Methods). **(b)** Pie chart of the genomic distribution of SureSelect assayed CpG's common for 0 h (EtOH control) and 40 min estradiol (E2) treatment; in total 3,525,513 CpG's with an applied read coverage cutoff of 5. Protein coding gene (PCG) and long ncRNA promoters are here defined as  $\pm 2$ kb intervals around the transcription start site (TSS). PRESTIGE enhancers are from<sup>1</sup>. Putative bidirectional enhancers ( $\pm 1$ kb extended) are from<sup>2</sup>. **(c-d)** Related to main Fig. 1b: **(c)** K-means clustering of 2,685 long ncRNAs including expression (GRO-seq<sup>3</sup> and chromatin-associated RNA-seq), histone mark signal values, ChIA-PET maximum interaction scores and SureSelect assayed DNA methylation (promoter b-value mean). **(d)** This heatmap is the result of the following analysis: k-means clustering was initially done for the 4,467 long ncRNAs without DNA methylation as a clustering parameter (Fig. 1b) and then the promoter b-value mean was attached for the entries with assayed DNA methylation ( $n = 2,685$ ) producing the heatmap shown here (entries have been ordered within each cluster according to increasing DNA methylation). **(e-g)** Positional distribution of histone marks around the transcription start site (TSS) of the clustered long ncRNAs of Fig. 1b. Average histone mark signal (IP/Input) for **(e)** H3K4me1, **(f)** H3K4me3 and **(g)** H3K27Ac was smoothed over a 500 bp sliding window average (sliding step 1)  $\pm 5$ kb around the TSS of the clustered long ncRNAs followed by min-max rescaling for all.

Supplementary Figure 2

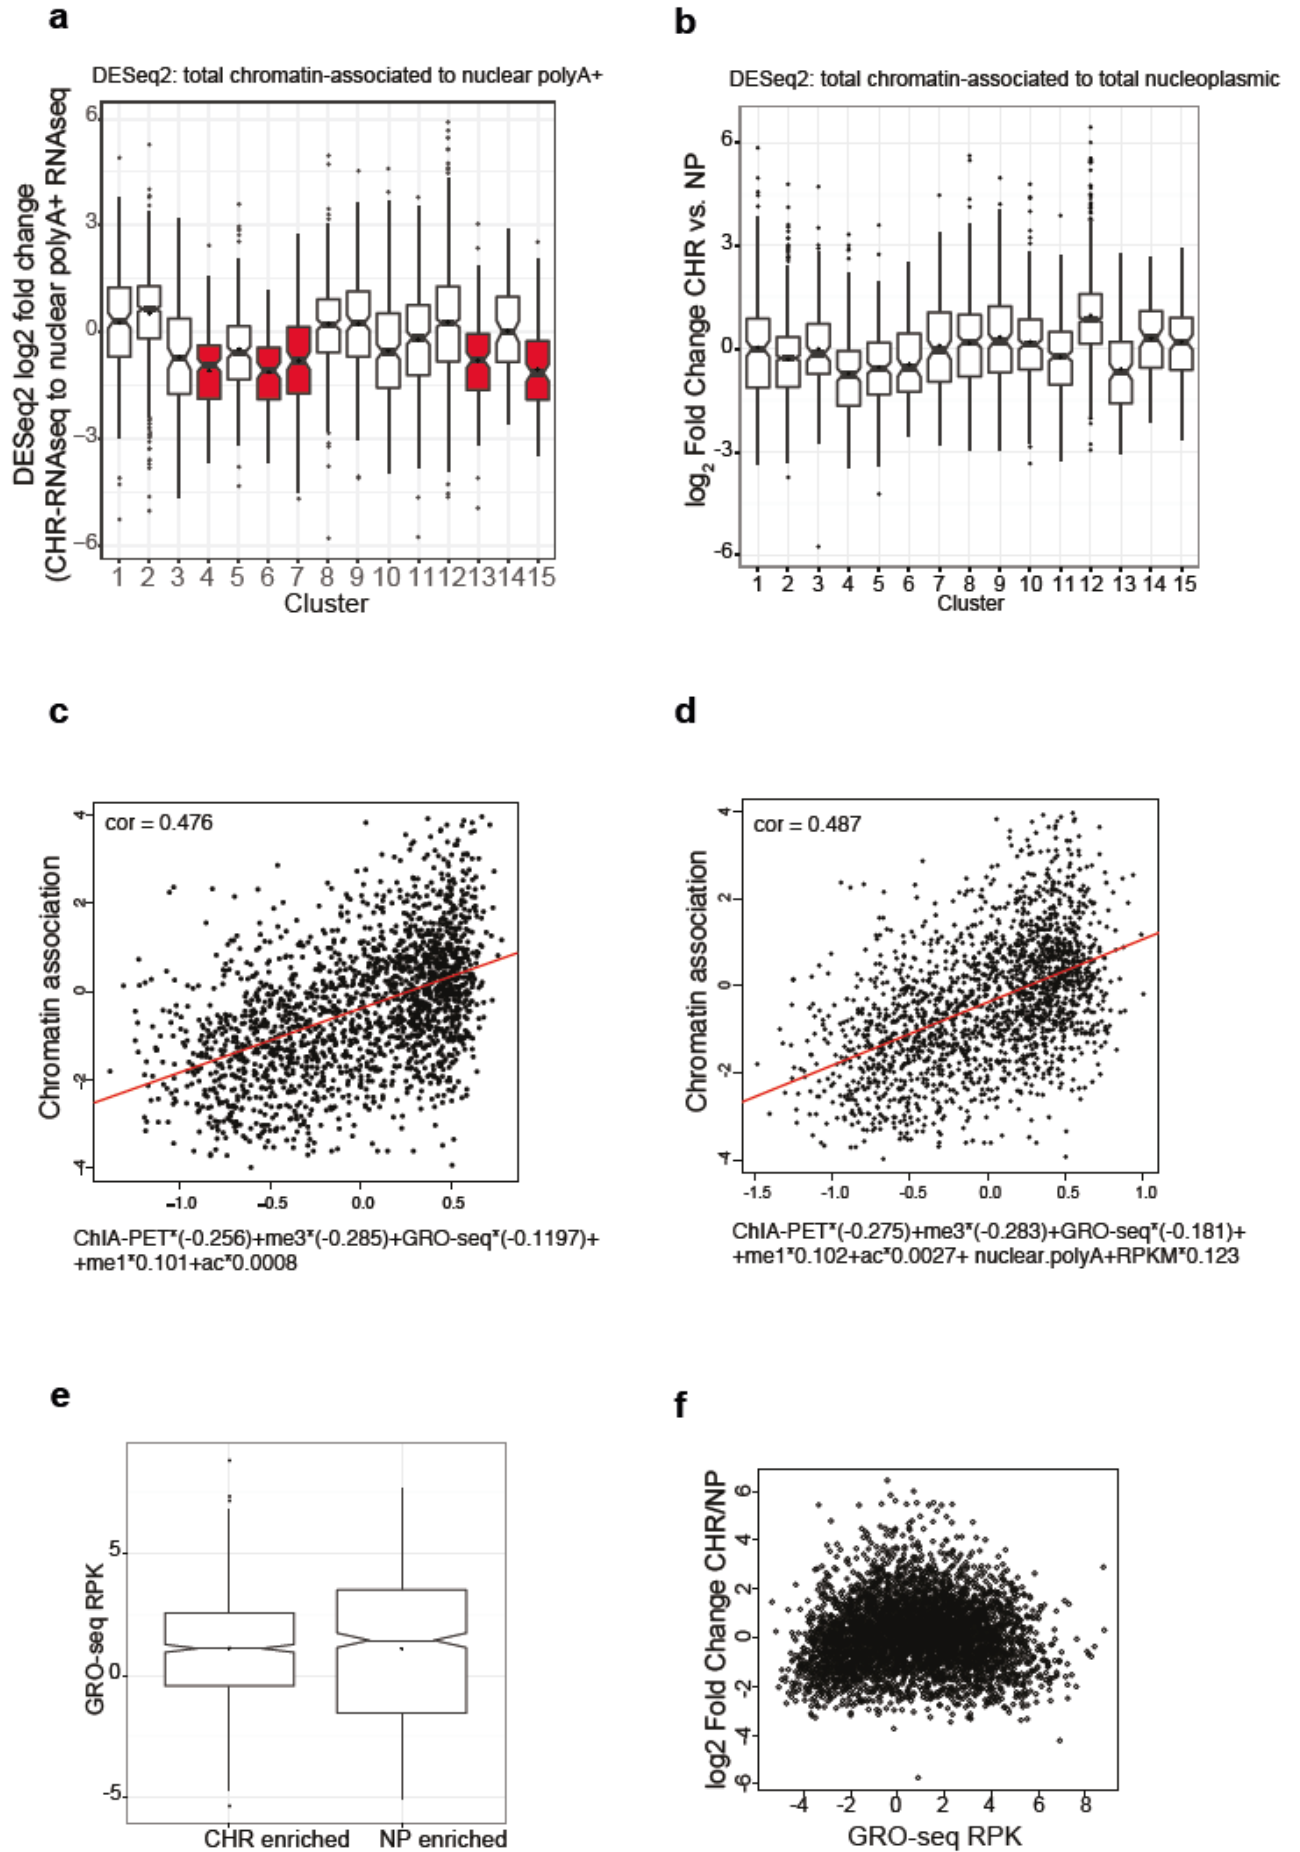

## Supplementary Figure 2: Differential chromatin-association of long ncRNAs

**(a)** DESeq2 generated log<sub>2</sub> fold changes in expression using total chromatin-associated versus nuclear polyA+ RNA-seq (ENCODE), for the clustered long ncRNAs of Fig. 1b. (See also Fig. 1d-e).

**(b)** DESeq2 generated log<sub>2</sub> fold changes in expression using total chromatin-associated versus nucleoplasmic RNA-seq, for the clustered long ncRNAs of Fig. 1b. (See also Fig. 1d-e). Significantly nucleoplasmic-enriched long ncRNAs (at *DESeq2* p-adjusted < 0.1) are significantly enriched in clusters 4, 5, 6 and 13 (Fisher's exact test p-value = [5.676e-12, 1.026e-12, 2.653e-06, 1.089e-07] and odds ratio = [2.53, 2.45, 2.35 and 2.36], respectively).

**(c)** Linear regression analysis by incorporating the parameters ChIA-PET interaction score, GRO-seq RPKM, H3K4me3, H3K4me1 and H3K27ac, in the prediction of chromatin-association of long ncRNAs. The generated numeric coefficients for each variable are included in the type below the scatterplot. The red line represents the linear regression model fit (correlation = 0.476, p-value < 2.2e-16). The variables ChIA-PET score and H3K4me3 produce the highest negative coefficients in determining the fit (-0.256 and -0.285, respectively, at p-value < 2.2e-16).

**(d)** Same as in c) but with one additional variable included, that is nuclear polyA+ RPKM.

**(e)** Boxplot showing expression (GRO-seq reads per kb, RPK) of significantly chromatin enriched (CHR enriched, n = 847) and significantly nucleoplasmic enriched (NP enriched, n = 719) long ncRNAs, at *DESeq2* p-adjusted < 0.1 and a cutoff of *DESeq2* log<sub>2</sub> fold-change CHR/NP set at 1, i.e. at least two fold enrichment either in chromatin or nucleoplasm.

**(f)** Scatterplot of *DESeq2* generated log<sub>2</sub> fold changes CHR/NP and GRO-seq RPK for all assayed long ncRNAs.

### Supplementary Figure 3

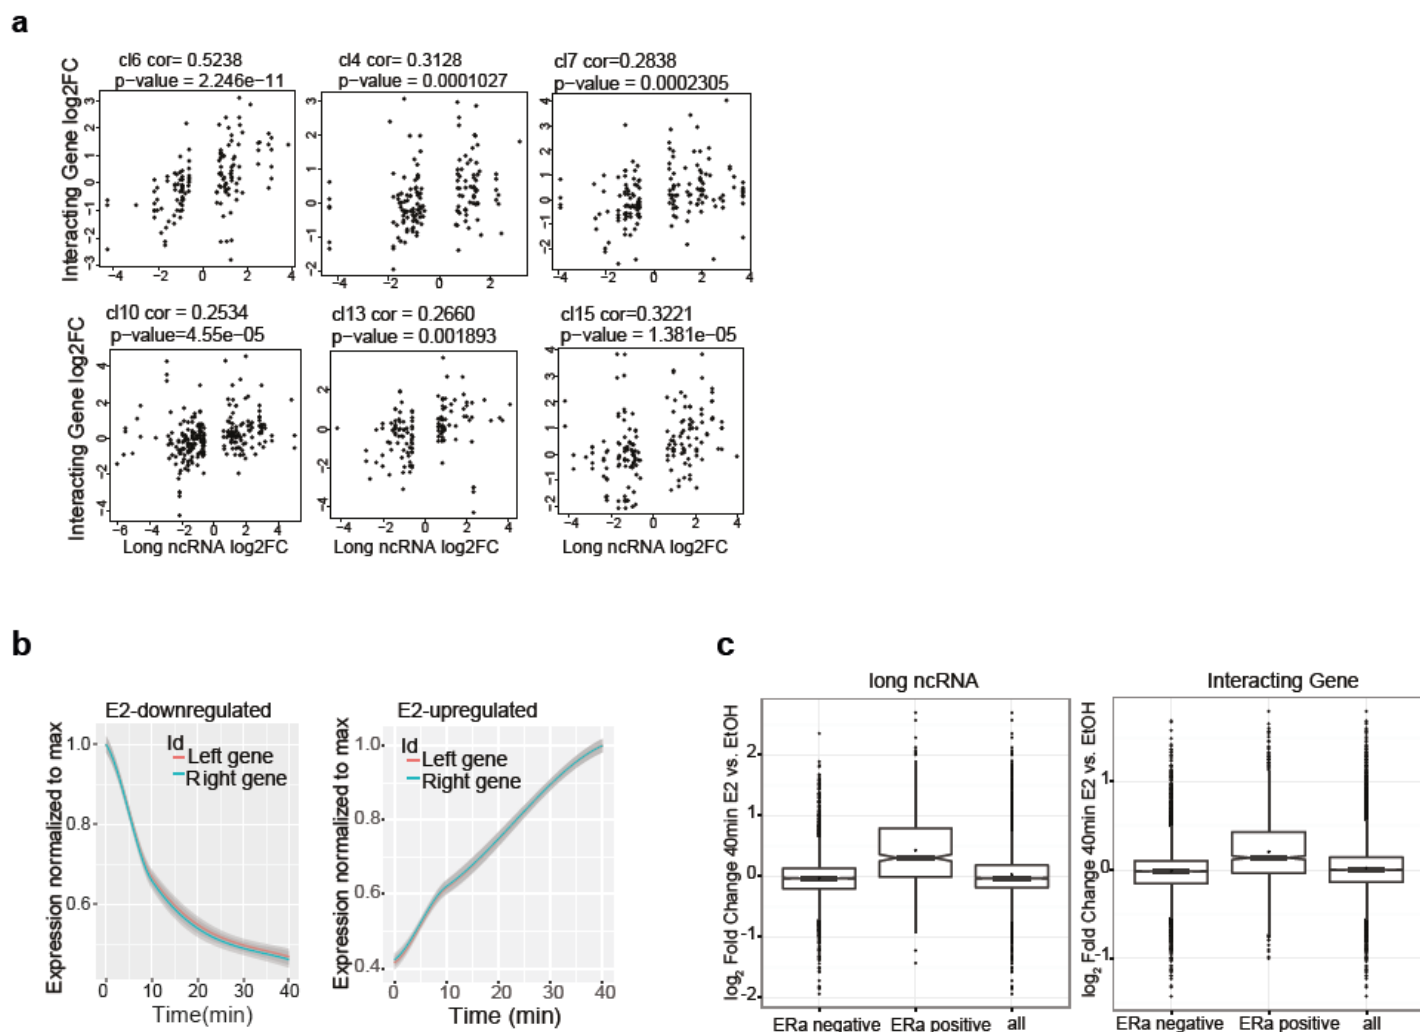

### Supplementary Figure 3: Coordinated expression responses of ChIA-PET interacting pairs

**(a)** Scatterplots showing correlation of E2-mediated log<sub>2</sub> fold changes in expression (40 min E2 treatment vs. EtOH control; GRO-seq<sup>3</sup>) for long ncRNAs of clusters 6, 4, 7, 10, 13, 15 (Fig. 1b) and ChIA-PET identified interacting genes. **(b)** E2-mediated time response of downregulated (left panel) and upregulated (right panel) randomly selected ChIA-PET interacting gene-gene pairs (with a ChIA-PET score > 200). GRO-seq RPKM from 0, 10 and 40 min of E2 treatment were normalized to maximum expression i.e. to the 0 min in the case of downregulated pairs (left panel) and to the 40 min time point in the case of upregulated pairs (right panel). Fitted regression model lines (loess curves) are shown and the 95% confidence interval is grey shaded. The analysis was ran several times (> 10) with different pools of randomly sampled ChIA-PET interconnected gene-gene pairs, producing similarly overlapping time responses. **(c)** Boxplot showing *DESeq2* generated regularized

*log2* fold changes in expression of 40 min E2 treated MCF-7 cells versus control, using GRO-seq<sup>3</sup>, for long ncRNAs (left) and their ChIA-PET identified interacting genes (right), sub-categorized as either ERa-positive or ERa-negative, based on the presence or not of ERa binding sites (ChIP-seq peaks) +/-10 kb around the transcription start site (TSS). (ERa ChIP-seq data are from<sup>4</sup> (GSM365926). For the 4,467 long ncRNAs (left): 513 have ERa +/-10 kb around the TSS (ERa-positive), and of those, 382 are E2-upregulated showing significantly higher *log2* fold changes in expression than the rest (ERa-negative or compared to all; Wilcoxon-Mann-Whitney test *p*-value < 2.2e-16). In addition, ERa-positive long ncRNAs are significantly enriched amongst E2-upregulated cases (Fisher's exact test *p*-value = 3.237e-11, odds ratio = 1.63). For the 7,272 interacting genes (right): 1238 are ERa-positive and of those, 860 are E2-upregulated showing significantly higher *log2* fold changes in expression (Wilcoxon-Mann-Whitney test *p*-value < 2.2e-16). In addition, ERa-positive genes are significantly enriched amongst E2-upregulated cases (Fisher's exact test *p*-value = 2.457e-11, odds ratio 1.39).

# Supplementary Figure 4

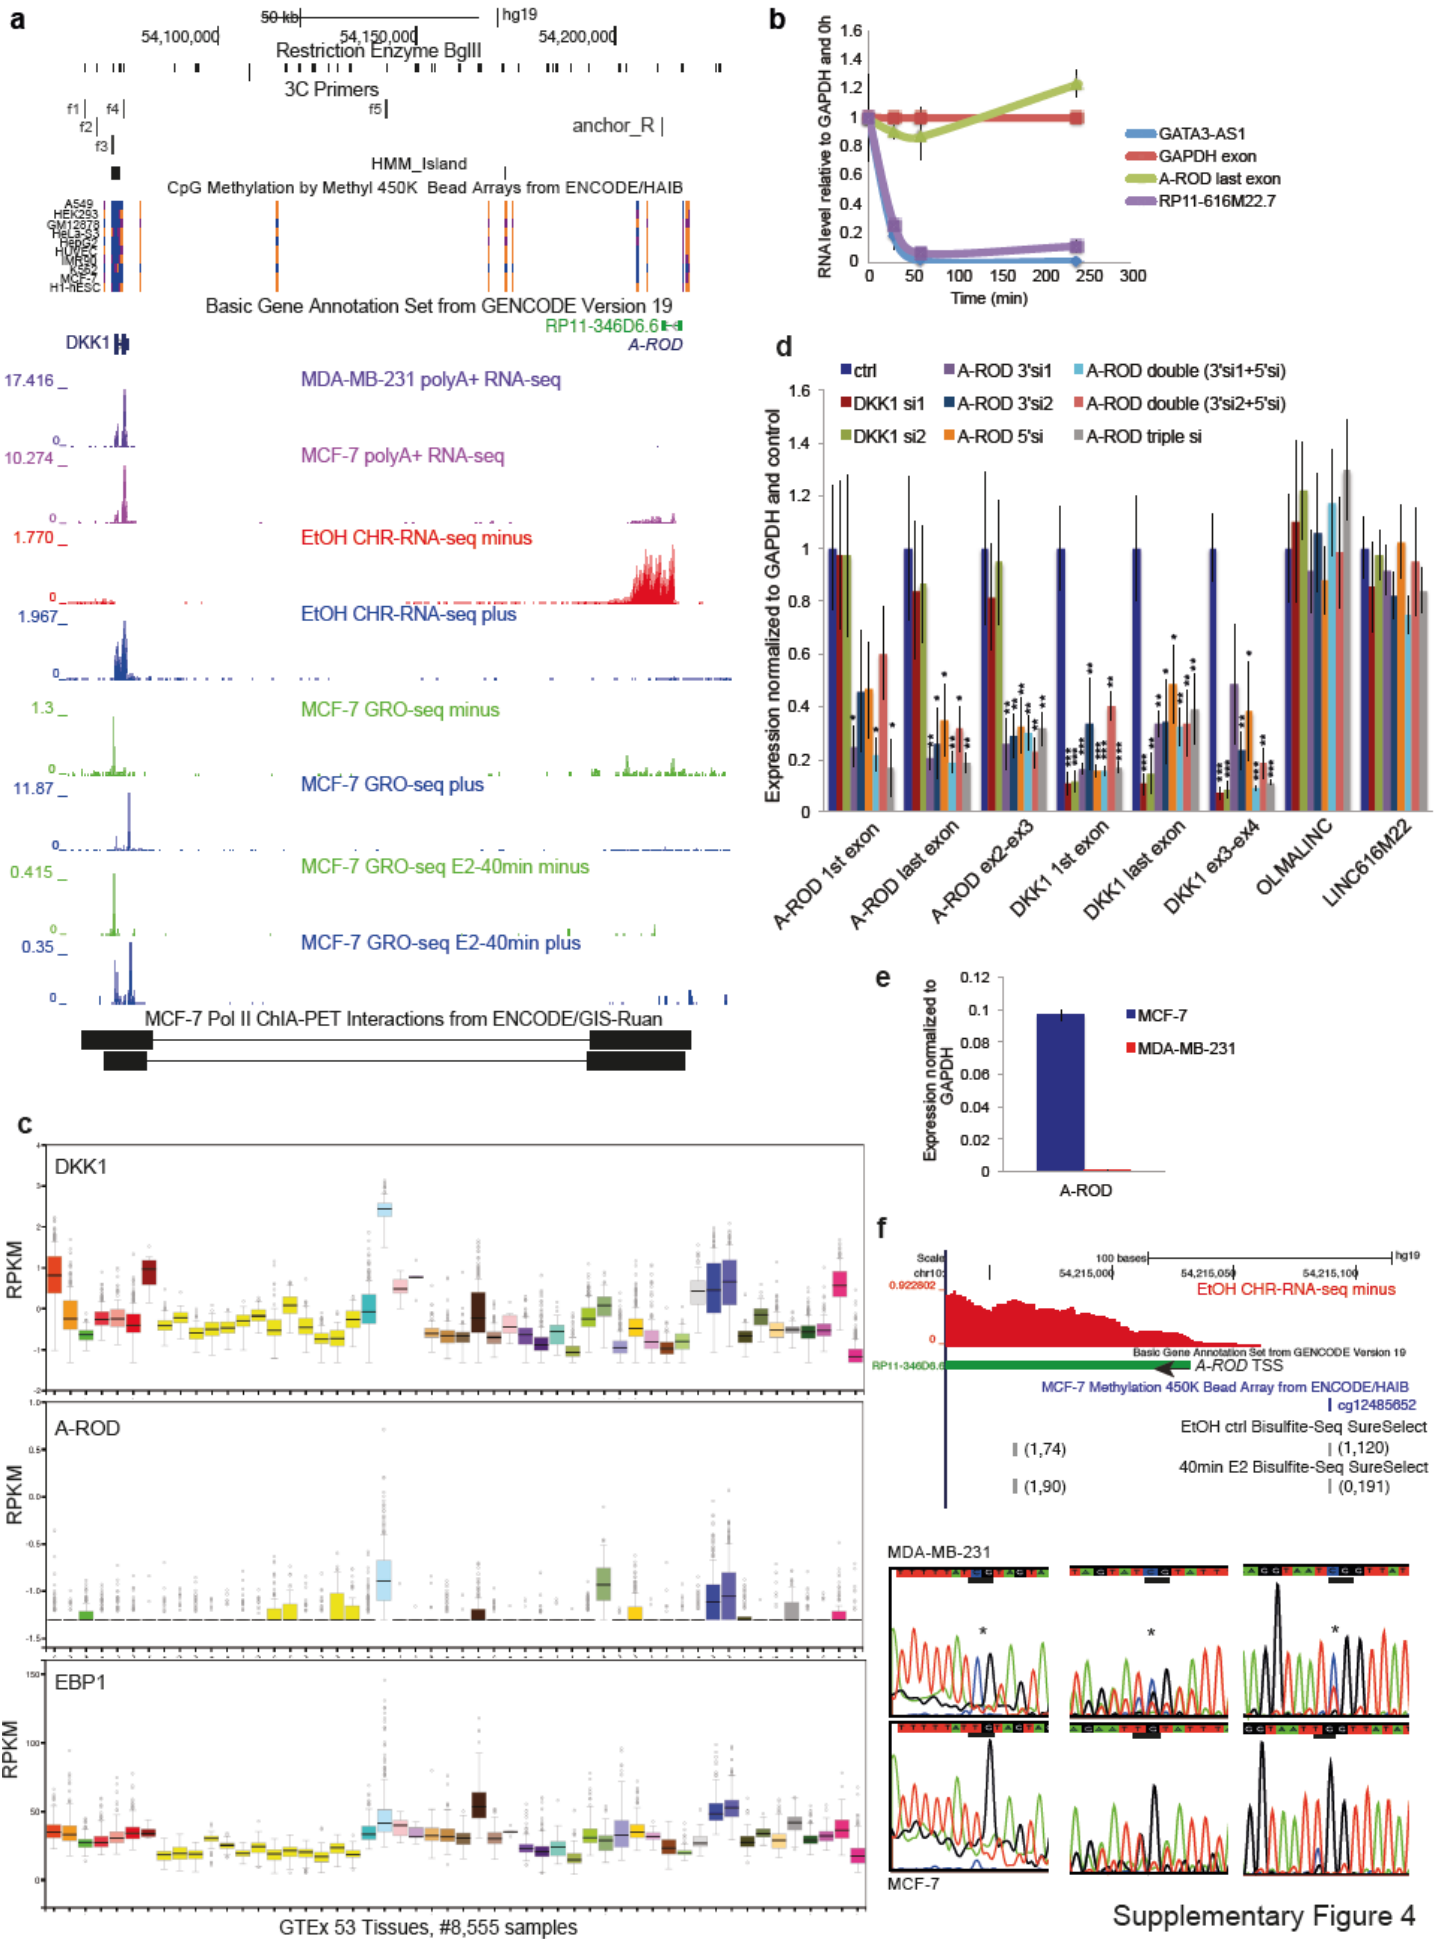

Supplementary Figure 4



#### Supplementary Figure 4: A-ROD regulates DKK1 expression

**(a)** UCSC genome browser overview of the DKK1 and A-ROD (RP11-346D6.6) genomic loci. Location of the 3C primers, polyA<sup>+</sup> RNA-seq data<sup>5</sup> from MDA-MB-231 and MCF-7 (GEO GSE37918), chromatin-associated RNA-seq in MCF-7 and GRO-seq<sup>3</sup> (GEO GSE43835) are shown (*y* axis reads per million). **(b)** RT-qPCR on whole-cell RNA from BrU pulse-chase triplicate experiments. MCF-7 cells were labeled with BrU for 30 minutes and then chased with excess of uridine for 30, 60 and 240 minutes. **(c)** Expression of DKK1, A-ROD and EBP1 (RPKM; plotted in the *log* scale for DKK1 and A-ROD) taken from the GTEx Project (version V6p). **(d)** Related to Fig. 3a. RT-qPCR levels of A-ROD, DKK1 and two unrelated long ncRNAs, in control and various siRNA treated cells, normalized to GAPDH and control condition. Whole-cell total RNA reverse-transcribed with random primers. Error bars represent normalized standard deviations from three independent experiments (*n* = 3 biological replicates, \**P*<0.05, \*\**P*<0.01, \*\*\**P*<0.001, two-tailed Student's *t*-test). For each amplicon the statistical significance of the change in the siRNA treatment conditions is extracted by comparing to the respective control. **(e)** Whole-cell RNA RT-qPCR assaying expression of A-ROD in MCF-7 and MDA-MB-213 cells. A-ROD expression is not detected in MDA-MB-231 in agreement with polyA<sup>+</sup> RNA-seq data from<sup>5</sup> (GSE37918) included as a track in a). **(f)** Upper panel: UCSC genome browser screenshot, zoom in the A-ROD promoter ( $\pm 100$  bp around TSS) showing ENCODE available DNA methylation data in MCF-7 (450K array assayed CpG, blue unmethylated; score = 97) and SureSelect bisulfite-seq (GEO submitted, Data Availability) in control (EtOH) and 40 min E2 treated MCF-7. There are two CpG's assayed, both unmethylated. In the parentheses, the number of methylated and unmethylated read counts per CpG is indicated (methylated, unmethylated). Lower panel: Sequencing electropherogram showing the methylation status of three CpG's from A-ROD promoter (PCR amplified fragment -300\_+100 bp around TSS) in MCF-7 (lower track) and MDA-MB-231 (upper track). All three CpG's are unmethylated in MCF-7 (C is bisulfite-converted to T) but fully or partially methylated in MDA-MB-231 (protected from C>T conversion). The PCR of bisulfite-converted DNA was done as described in

Methods (Locus-specific DNA methylation analysis). The third CpG shown here was not assayed in the SureSelect system.

### Supplementary Figure 5

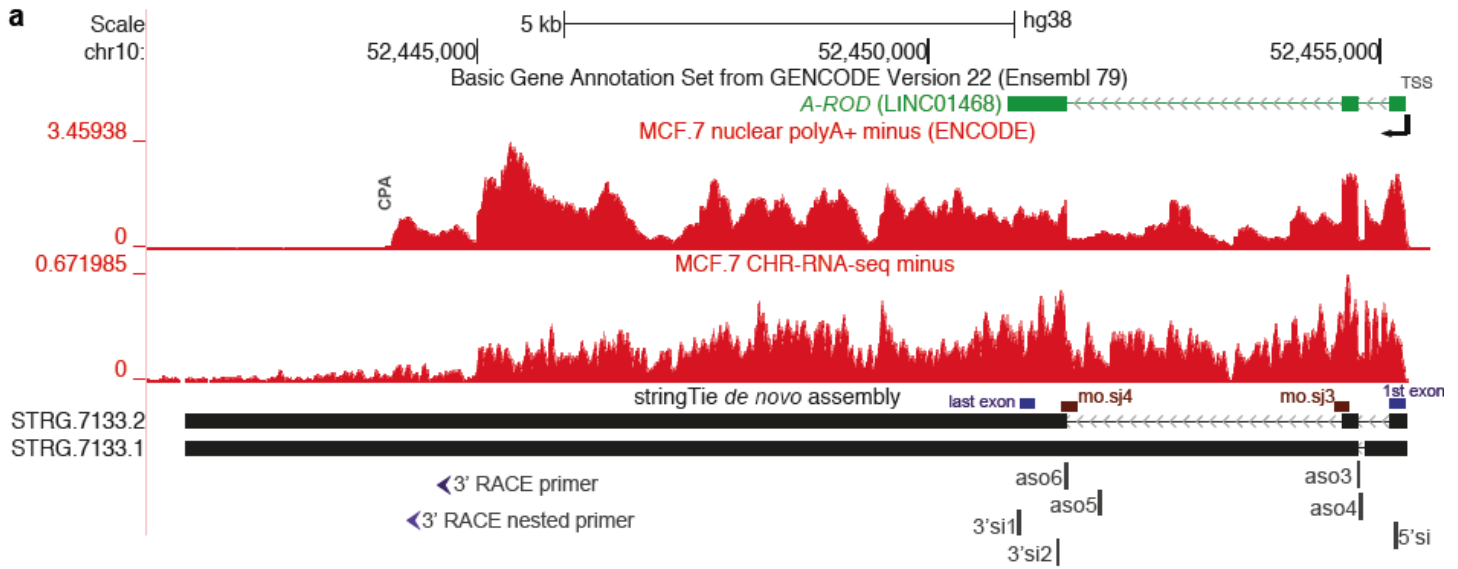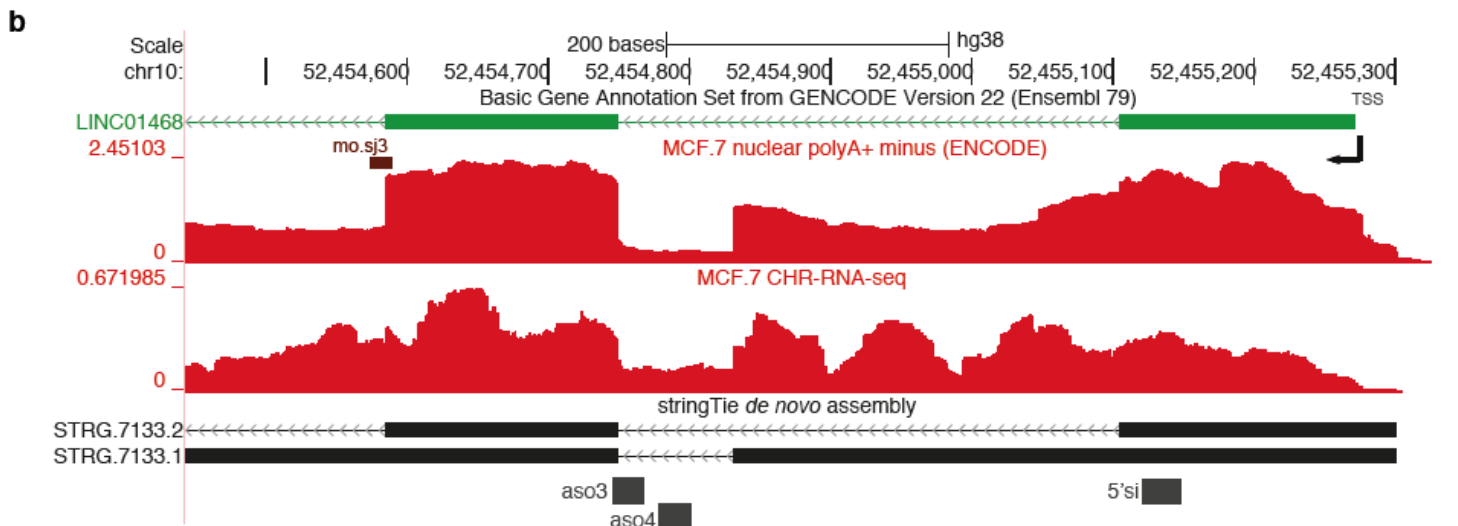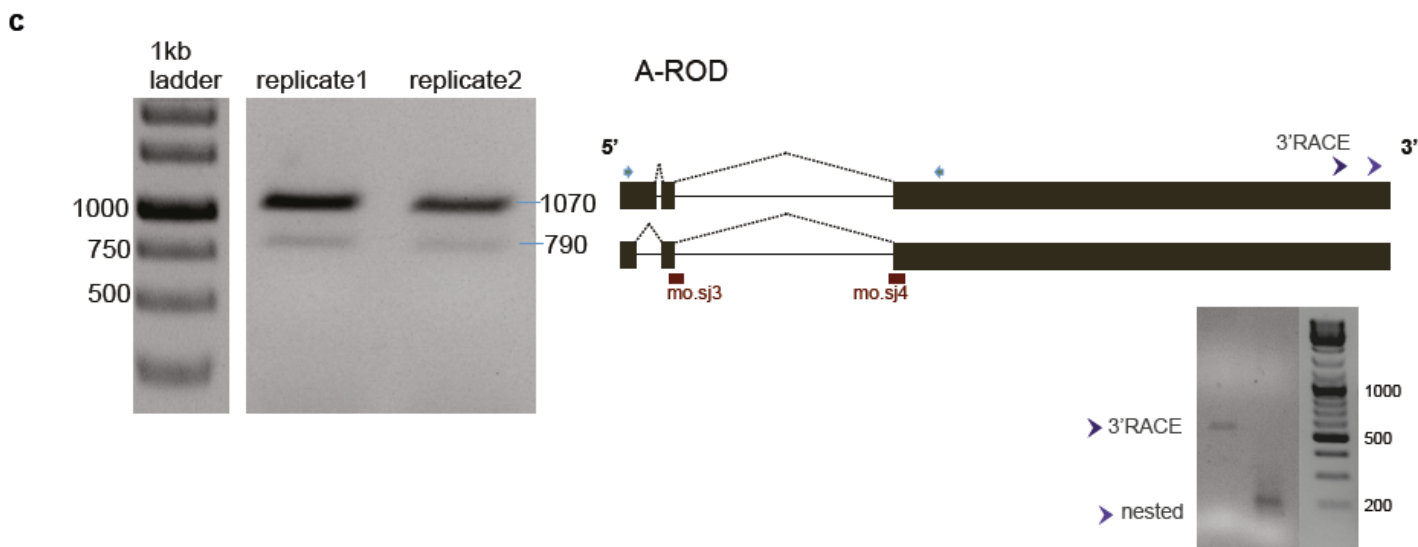

**d**

5' TTCTGTGCAAATTC**AATA**AAATGAAATGTAATTGATCCTCAAAA**A**TATGATTCATCT**TATTTT**AAGTCATCAGTC 3'

PAS blocker

CPA blocker

**Supplementary Figure 5: Structure of the A-ROD transcript with siRNA and ASO positions.**

**(a)** UCSC genome browser overview of the A-ROD transcription unit. Tracks of the ENCODE nuclear polyA+ RNA-seq and *de novo* transcript assembly from our total chromatin-associated RNA-seq (see Methods) are displayed. Blue bars depict first and last exon qPCR amplicons. **(b)** Zoom in the first exon-intron interval of A-ROD showing positions of the ASOs targeting the common first intronic sequence shared by the two isoforms. **(c)** Verification of the two predicted splicing isoforms by semi-quantitative PCR. The blue arrows above the scheme represent the left and right PCR primers (A-ROD\_cDNA.F and A-ROD\_cDNA.R, listed in Supplementary Table 1). The splicing-inhibiting morpholinos (Fig. 6) are represented by red bars: mo.sj3, targeting splice donor site of the 2<sup>nd</sup> intron; and mo.sj4, targeting the splice acceptor site. Position of the 3' RACE primers is also shown (Supplementary Table 1). Lower right panel: Analysis of the 3' RACE products on 1% agarose gel. The two bands were excised, DNA was gel-extracted and sequenced for 3' end verification (position of the cleavage and polyadenylation site, CPA). **(d)** Sequence around the CPA of A-ROD. Positions of the 2'OMePS oligos targeting that polyadenylation signal (PAS, the hexamer AATAAA) and the CPA and downstream T-rich stretch are underlined (related to Fig. 6).

## Supplementary Figure 6

**a**

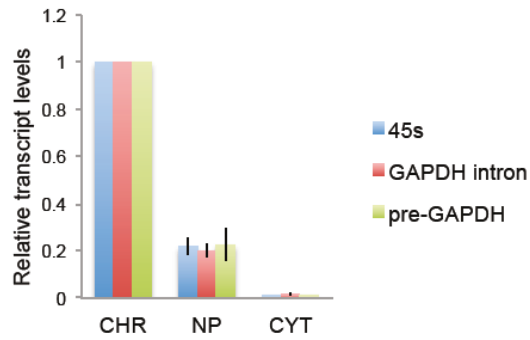

**b**

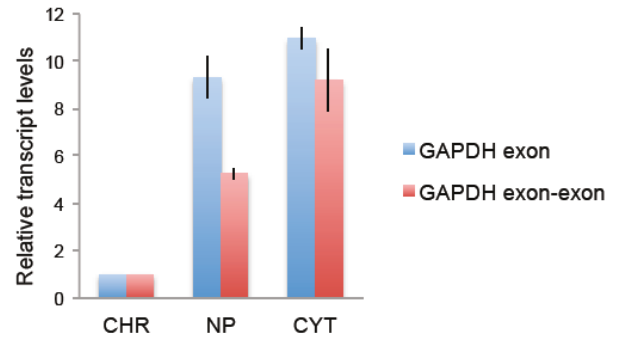

### Supplementary Figure 6: Cell fractionation control

**(a-b)** RT-qPCR assaying the relative transcript levels of relevant markers in the three cellular fractions, normalized to the respective values in the chromatin-associated fraction. Error bars represent standard deviations from three independent fractionation experiments.

## Supplementary Figure 7

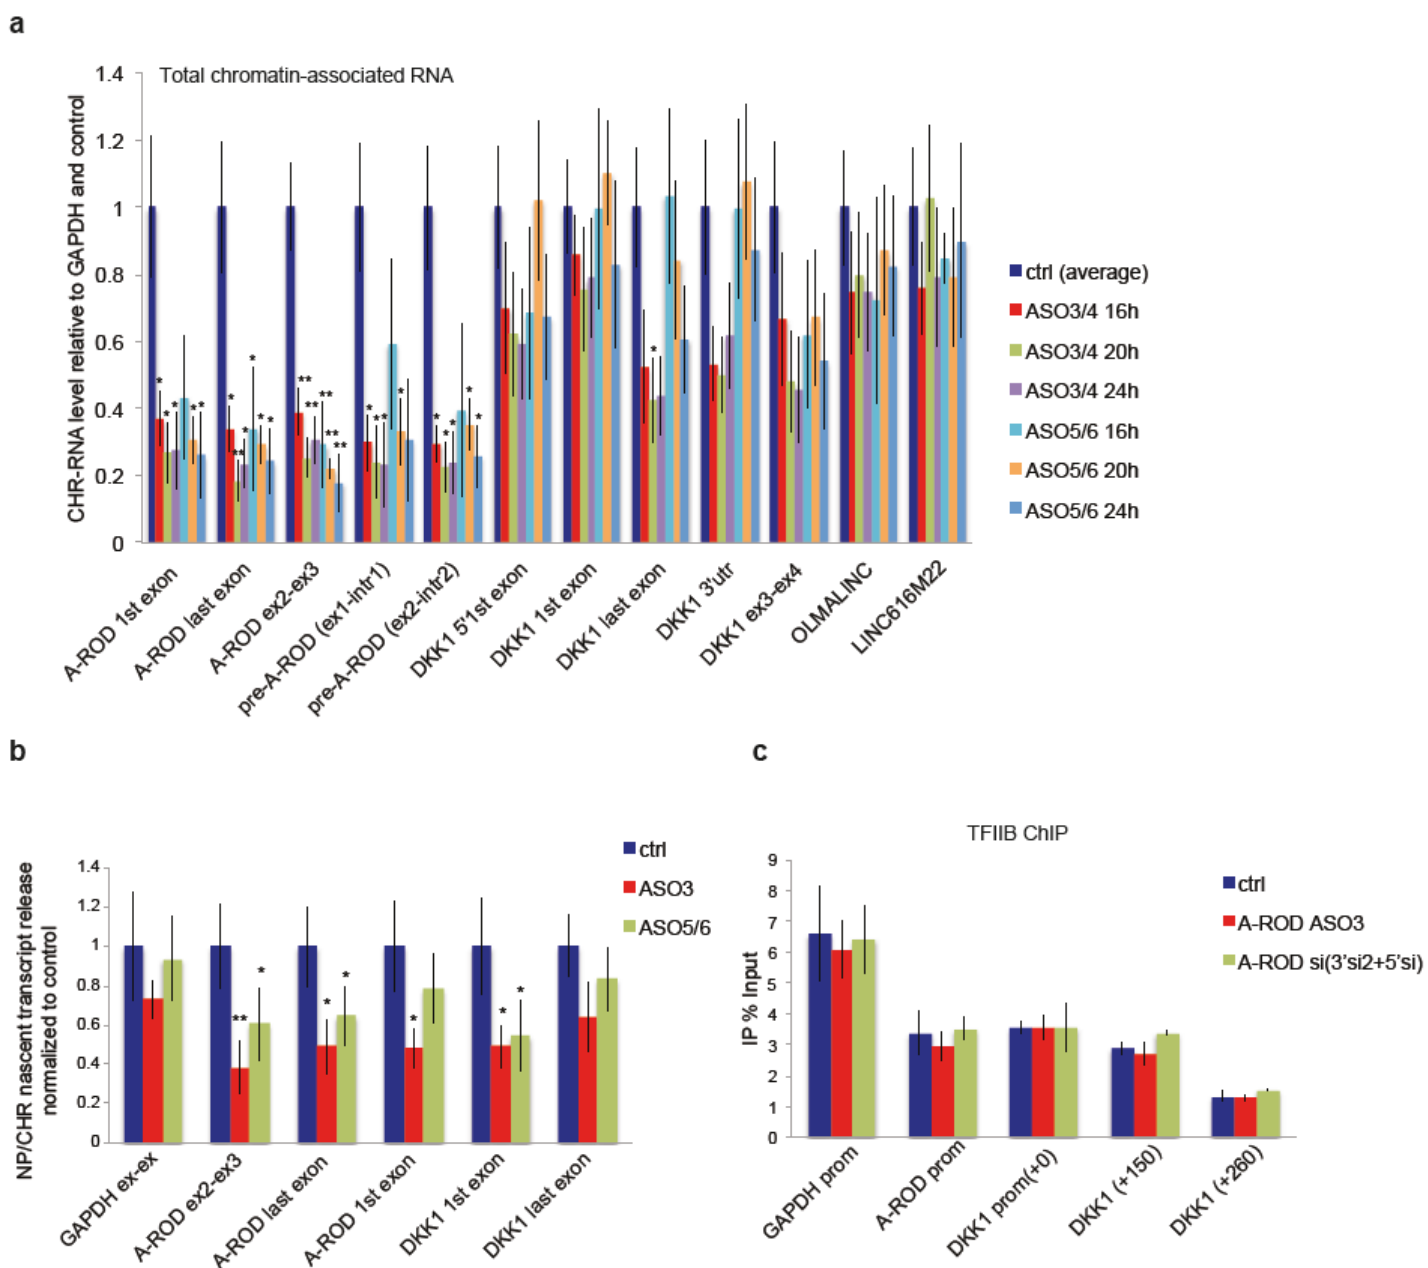

### Supplementary Figure 7: A-ROD regulates DKK1 transcription at its release from chromatin

(a) RT-qPCR assaying the steady-state chromatin-associated RNA levels using several amplicons at three time-points post-transfection of pooled intronic ASO sequences at 100 nM final concentration; either ASO 3 and 4 targeting the first intron of A-ROD or ASO 5 and 6 targeting the second intron; or the standard negative control ASO. Error bars represent standard deviations from three independent experiments ( $n = 3$  biological replicates,  $*P < 0.05$ ,  $**P < 0.01$ , two-tailed Student's *t*-test). (b) Nascent transcript release assayed by extracting the ratio of BrU-labeled nucleoplasmic to

BrU-labeled chromatin-associated RNA. Error bars represent standard deviations from three independent experiments (n = 3 biological replicates, \* $P < 0.05$ , \*\* $P < 0.01$ , two-tailed Student's t-test). (c) TFIIB ChIP in control and A-ROD siRNA (here pooled A-ROD.5'si and A-ROD.3'si2) or A-ROD intronic-ASO3 treated cells. Error bars represent standard deviations from three independent experiments.

## Supplementary Figure 8

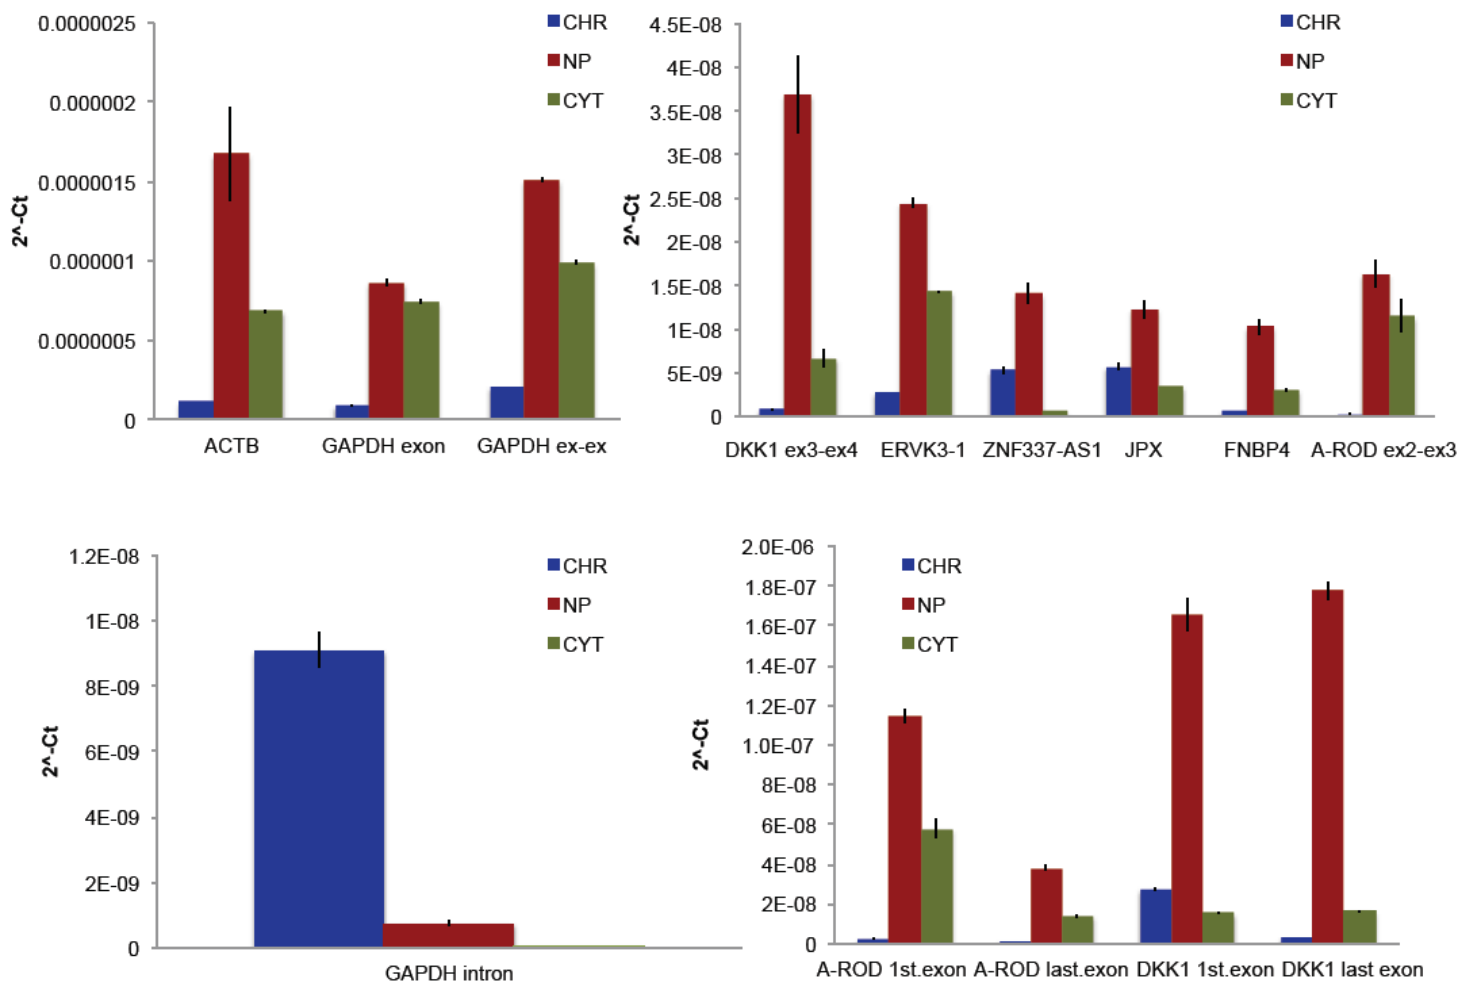

### Supplementary Figure 8: Relative abundances of RNA transcripts in the three cellular fractions

RT-qPCR measured RNA levels upon cell fractionation. The absolute values ( $2^{-Ct}$ ) are plotted. 300 ng of chromatin-associated (CHR), nucleoplasmic (NP) or cytoplasmic RNA (CYT) were reverse-transcribed with random primers. Error bars represent standard deviations from three independent fractionation assays.



# Supplementary Figure 9

**a**

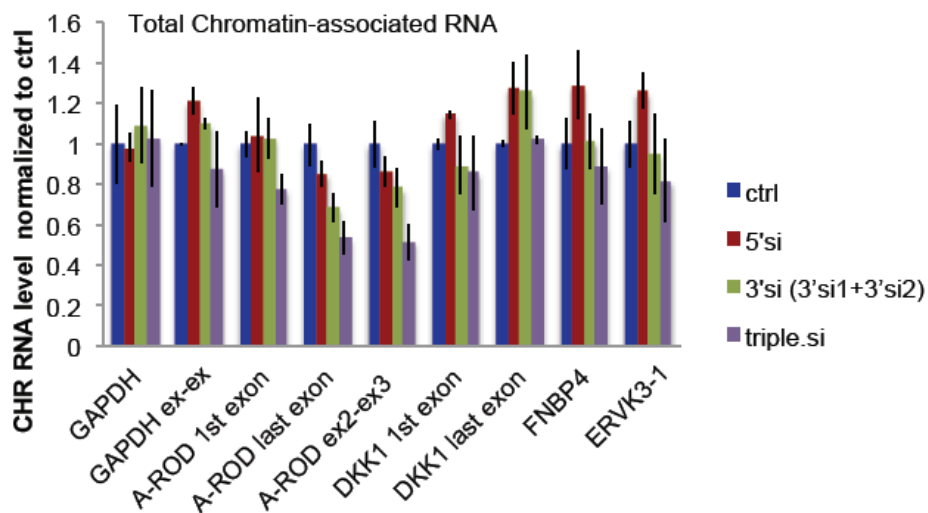

**b**

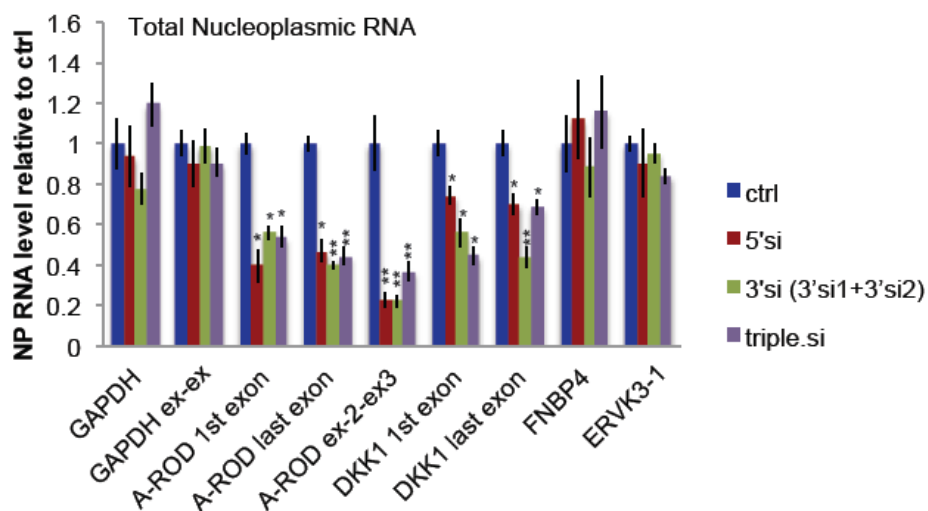

**c**

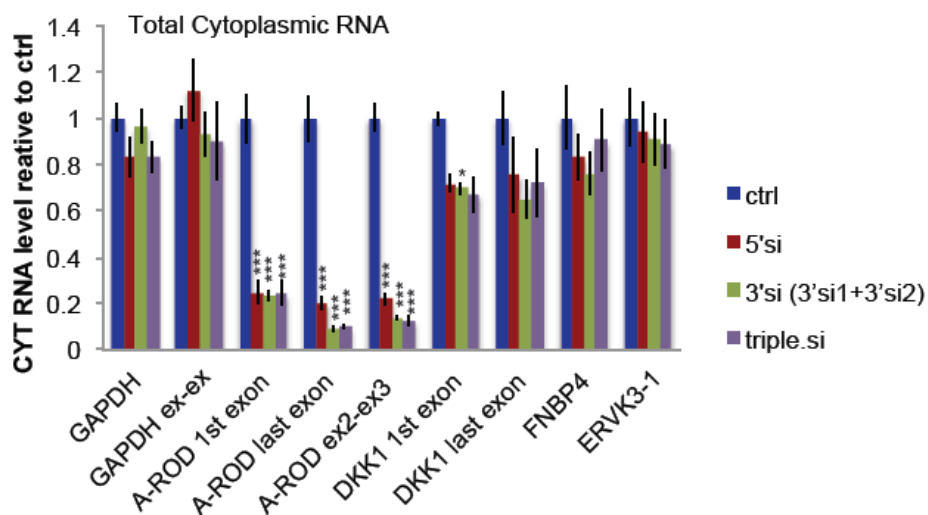

**Supplementary Figure 9: RNA levels in the three cellular fractions upon siRNA transfection**

**(a-c)** RT-qPCR measured RNA levels assessed in the three cellular fractions upon A-ROD siRNA transfection, normalized to the respective control. 300 ng of **(a)** chromatin-associated RNA, **(b)** nucleoplasmic RNA, and **(c)** cytoplasmic RNA were reversed-transcribed with random primers. The final siRNA concentration was kept constant at 45 nM (e.g. 15 nM of each siRNA in the triple transfection experiment). Error bars represent normalized standard deviations from three independent experiments (n = 3 biological replicates, \* $P < 0.05$ , \*\* $P < 0.01$ , \*\*\* $P < 0.001$ , two-tailed Student's t-test).

**Supplementary Table 1. Primer sequences.**

| Primers used in RT-qPCR: |                            |
|--------------------------|----------------------------|
| GAPDH_prom.F             | CGGTTTCTATAAATTGAGCCCGCAG  |
| GAPDH_prom.R             | CAAAAGAAGATGCGGCTGACTGTC   |
| GAPDH_exon.F             | GATTCCACCCATGGCAAAT        |
| GAPDH_exon.R             | GACAAGCTTCCCGTTCTCAG       |
| GAPDH_mature.F           | GCTCTCTGCTCCTCTGTTT        |
| GAPDH_mature.R           | ACGACCAAATCCGTTGACTC       |
| A-ROD_exon3.F            | AAGGGGAGCCAGTGAAGATG       |
| A-ROD_exon2.R            | TGGGGTTATCAGCAGTCTTCAAAT   |
| A-ROD_prom.F             | GTTCCCCTTCAGACAATCCTCATCG  |
| A-ROD_prom.R             | TTGTAGACTCTGAGTACGGTGCTGA  |
| A-ROD_1st.exon.F         | CTTGGCCTTTGTTCCCCTTC       |
| A-ROD_1st.exon.R         | TTGTAGACTCTGAGTACGGTGC     |
| A-ROD_last.exon(body).F  | CGTCCACCTGCAAATACTATGCTC   |
| A-ROD_last.exon(body).R  | AGAGAAATGTCAACTTCTGGCCACA  |
| DKK1_prom.F              | GGCTTTGTTGTCTCCCTCCAAG     |
| DKK1_prom.R              | TCACTTTGCAAGCCTGGGTCC      |
| DKK1_5'1st.exon.F        | CCTGACTCTGCAGCCGAACC       |
| DKK1_5'1st.exon.R        | AGCCATCATCTCAGAAGGACTCAAGA |
| DKK1_1st.exon.F          | GGGTCTTTGTCGCGATGGTA       |
| DKK1_1st.exon.R          | GCGTTGGAATTGAGAACCGAG      |
| DKK1_last.exon(body).F   | CTTGCCGGATACAGAAAGATCACCA  |
| DKK1_last.exon(body).R   | AGTTCACTGCATTTGGATAGCTGGT  |
| DKK1_3'utr.1F            | AAGCATAACCCTTTACCCCATTT    |
| DKK1_3'utr.1R            | AGGTACCTATCATTTGTCATTCCAA  |
| DKK1_3'utr.3F            | TTTTCGGACAAGGAAGAAAATCATC  |
| DKK1_3'utr.3R            | TGTATTTATGGGCACACATCCTG    |
| OLMALINC.F               | TCCCGATCTGCCAACAATTTT      |
| OLMALINC.R               | GCCTGTCAGAACCCACTCATT      |
| LINC-616m22.F            | CACCATCACTCGATTCCCAAAG     |
| LINC-616m22.R            | GTTTGCTCTAGGTCTGGGTCT      |
| PA2G4F                   | AAAGAAGGCCTCCAAGACTGCAG    |
| PA2G4R                   | CACCTCAGTCCCCAGCTTCATTT    |
| A-ROD.readthrough1_F     | AGTCTCCACATTGCTGACAGAACA   |
| A-ROD.readthrough1_R     | TGCTATGAATCAGGCACCACACT    |
| A-ROD.readthrough2_F     | TGACCTAACACTCCTCTGGTTCT    |
| A-ROD.readthrough2_R     | CTGAAGTGGGGATGCAGGCA       |
| A-ROD.readthrough3_F     | AAACCCTAATCACAGCCAGTCCG    |
| A-ROD.readthrough3_R     | GCACAGTCTTCACAAAACAGCAACA  |
| pre-A-ROD.F              | TGATCTCACTCAGTCTCACGGCT    |
| pre-A-ROD.R              | TGAAAGGAGAGGTAGAGGCTGGAA   |
| A-ROD.intronF            | AGAAGCCAACATTACCCTAAGCCA   |
| A-ROD.intronR            | CCAGTTCCATTAGCCTGTGTCCA    |
| ACTB_F                   | CCTGGCACCCAGCACAATGAA      |
| ACTB_R                   | CGGACTCGTCATACTCCTGCTTGC   |
| FNBP4_F                  | GAGATGCTGGCTGGCTGATA       |

|                                                                            |                                          |
|----------------------------------------------------------------------------|------------------------------------------|
| FNBP4_R                                                                    | GCCTTGGAGGAAGGAGATGG                     |
| ZNF337-as1F                                                                | CCTTGC GTTCTCAGGTCTTTGGA                 |
| ZNF337-as1R                                                                | TCTGCCAGCACTAGGAGACAAGA                  |
| JPX_F                                                                      | GGAAGACTTAAGATGGCGGCGTT                  |
| JPX_R                                                                      | GGACTCATACTTCGGACGCCTTG                  |
| ERVK3_F                                                                    | CGTGACAAGTGGTGCCCGAC                     |
| ERVK3_R                                                                    | ATATTCTCCGCCGGCAGACTCTC                  |
| Primers used in semi-quantitative PCR (Supplementary Fig. 5C, left panel): |                                          |
| A-ROD_cDNA.F                                                               | AATGACTTGTCTCGGTCAATTAGAGTA              |
| A-ROD_cDNA.R                                                               | CCTGAGTCCTTG TAGACTCTGAGTAC              |
| Primers used in 3' RACE (Supplementary Fig. 5C, right panel):              |                                          |
| A-ROD.last_exon.R 3'RACE                                                   | TCTCCTAGTAAGCCAGTAATGGAAAC               |
| A-ROD.last_exon.pA_R nested                                                | TGAACAAAGGGCAATGTAAGGCT                  |
| AUAP 3'RACE                                                                | GGCCACGCGTCGACTAGTAC                     |
| AP_RT 3'RACE                                                               | GGCCACGCGTCGACTAGTACTTTTTTTTTTTTTTTTTTVN |
| Primers used in Fig. 6d:                                                   |                                          |
| A-ROD_cDNA_RT                                                              | AGGAAGTTCCATAGCTAGTCTTCGTAG              |
| A-ROD_cDNA_F2                                                              | GGGTTATCAGCAGTCTTCAAATTG                 |
| A-ROD_cDNA_R1                                                              | AGATTGCACATCCAAGCCAAGATGCCA              |
| Primers used in 3C:                                                        |                                          |
| anchor_R                                                                   | CCTAGCAGGGCTTGAGTCTCAACTCTGC             |
| 3c_f1                                                                      | GAGCCACCATGCCTGGCCTCGATAGATC             |
| 3c_f2                                                                      | CTAGCCTCTTA ACTCCTTGGCACGATGC            |
| 3c_f4                                                                      | GAAGGTTCTGTTTGTCTCCGGTCATCAG             |
| 3c_f3                                                                      | GAGGAGGGCAACTGAAGGACCTCAAAGC             |
| 3c_f5                                                                      | GAAAGTGGATATTTGCTACCATGCTTCA             |

**Supplementary Table 1. Primer sequences.**

**Supplementary Table 2. Oligos for A-ROD purification; siRNA and ASO sequences.**

|         |                         |
|---------|-------------------------|
| A-ROD1  | CTAACATCATCTTGAATTCTCC  |
| A-ROD2  | AGAGCAGTAGAGTTCTAAGTGG  |
| A-ROD3  | CATCCTTGCTCCCTCTGTGCC   |
| A-ROD4  | AATCTCTTCTTCCCTTAGACTT  |
| A-ROD5  | TACTTGGCATCTTGGCTTGGAT  |
| A-ROD6  | CATCTGTAACAGAAATGACTACC |
| A-ROD7  | GGGCTCCGTCTTCAGACTTCTT  |
| A-ROD8  | TACCTCCATCTTCACTGGCTGC  |
| A-ROD9  | CAGAAGGGGCTTACTCTAGC    |
| A-ROD10 | ATAATTATCAGAGTTCCACTGG  |
| A-ROD11 | TCTCTGTTGAAAATTGTTTACA  |
| A-ROD12 | CTATGCTCCTTCATCTATATTA  |
| A-ROD13 | GTTCTATCAGCAGACAGATATA  |
| A-ROD14 | AGGCTTCTTTTGTAATTACTCA  |
| A-ROD15 | ACTATAATCTCTATTTTCAGGGA |
| A-ROD16 | GTCTGCACTGAGACATTCACTG  |
| A-ROD17 | TTGAGGCTGAAGATTAAGGGTC  |
| A-ROD18 | AGCACAGTAACTTATTATTAGC  |

|                                                   |                                                        |
|---------------------------------------------------|--------------------------------------------------------|
| A-ROD19                                           | TATTATCACTGTACGTATTGTG                                 |
| A-ROD20                                           | CTGTGTTTCAGGCGCTTGTGTAA                                |
| A-ROD21                                           | AATCAACATGAATTTTGGTTGC                                 |
| A-ROD22                                           | TTTTGAAACTACATTGGGAGGA                                 |
| LacZ_01                                           | CCAGTGAATCCGTAATCATG                                   |
| LacZ_02                                           | GTAGCCAGCTTTCATCAACA                                   |
| LacZ_03                                           | ATCTTCCAGATAACTGCCGT                                   |
| LacZ_04                                           | ATAATTTTCACCGCCGAAAGG                                  |
| LacZ_05                                           | TTCATCAGCAGGATATCCTG                                   |
| LacZ_06                                           | TGATCACACTCGGGTGATTA                                   |
| LacZ_07                                           | AAACGGGGATACTGACGAAA                                   |
| LacZ_08                                           | GTTATCGCTATGACGGAACA                                   |
| LacZ_09                                           | TGTGAAAGAAAGCCTGACTG                                   |
| LacZ_10                                           | GTAATCGCCATTTGACCACT                                   |
| A-ROD.5'si_sense                                  | rUrArCrUrGrCrGrArUrGrArGrGrArUrUrGrUrCrUrGrArAGG       |
| A-ROD.5'si_antisense                              | rCrCrUrUrCrArGrArCrArArUrCrCrUrCrArUrCrGrCrArGrUrArGrC |
| A-ROD.3'si1_sense                                 | rGrArCrCrGrArGrArCrArArGrUrCrArUrUrUrArArArCrUAA       |
| A-ROD.3'si1_antisense                             | rUrUrArGrUrUrUrArArArUrGrArCrUrUrGrUrCrUrCrGrGrUrCrArA |
| A-ROD.3'si2_sense                                 | rGrUrArGrGrArArGrUrUrCrCrArUrArGrCrUrArGrUrCrUTC       |
| A-ROD.3'si2_antisense                             | rGrArArGrArCrUrArGrCrUrArUrGrGrArArCrUrUrCrCrUrArCrArC |
| DKK1.si1_sense                                    | rArGrUrUrArArGrCrArUrUrCrCrArArUrArArCrArCrCrUTC       |
| DKK1.si1_antisense                                | rGrArArGrGrUrGrUrUrArUrUrGrGrArArUrGrCrUrUrArArCrUrGrA |
| DKK1.si2_sense                                    | rGrCrCrGrGrArUrArCrArGrArArArGrArUrCrArCrCrArUCA       |
| DKK1.si2_antisense                                | rUrGrArUrGrGrUrGrArUrCrUrUrUrCrUrGrUrArUrCrCrGrGrCrArA |
| A-ROD ASO3                                        | mC*mA*mU*CTG*TAA*CAGAA*TGACT*mA*mC*mC                  |
| A-ROD ASO4                                        | mU*mU*mC*CAG*CCTCT*ACCTCT*CCT*mU*mU*mC                 |
| A-ROD ASO5                                        | mA*mA*mC*ATT*ACCCT*AAGCCA*mU*mA*mA                     |
| A-ROD ASO6                                        | mU*mG*mG*CTG*ATTCC*AAAGAT*ACA*mA*mG*mA                 |
| Standard Negative Control                         | mC*mG*A*CTA*TACG*CGCA*ATA*mU*mG*mG                     |
| * Phosphorothioate Bond, m = 2'-O-Methyl RNA base |                                                        |
| siRNA Negative Control Duplex: DS NC1 (IDT)       |                                                        |

**Supplementary Table 2. Oligos for A-ROD purification; siRNA and ASO sequences.**

## References cited in the Supplementary Information

1. Corradin O, *et al.* Combinatorial effects of multiple enhancer variants in linkage disequilibrium dictate levels of gene expression to confer susceptibility to common traits. *Genome Res* **24**, 1-13 (2014).
2. Andersson R, *et al.* An atlas of active enhancers across human cell types and tissues. *Nature* **507**, 455-461 (2014).
3. Hah N, Murakami S, Nagari A, Danko CG, Kraus WL. Enhancer transcripts mark active estrogen receptor binding sites. *Genome Res* **23**, 1210-1223 (2013).
4. Welboren WJ, *et al.* ChIP-Seq of ERalpha and RNA polymerase II defines genes differentially responding to ligands. *EMBO J* **28**, 1418-1428 (2009).
5. Pellegrino L, *et al.* miR-23b regulates cytoskeletal remodeling, motility and metastasis by directly targeting multiple transcripts. *Nucleic Acids Res* **41**, 5400-5412 (2013).
