# Supplementary material for: Long ncRNA A-ROD activates its target gene DKK1 at its release from chromatin
Source: PubMed Central journal article supplement (PMC5915440; doi:10.1038/s41467-018-04100-3), 2018-04-24
Supplement: 41467_2018_4100_MOESM3_ESM.pdf [file 41467_2018_4100_MOESM3_ESM.pdf]

## Description of Additional Supplementary Files

**File Name: Supplementary Data 1**

**Description:** List of 4,467 long ncRNAs used for all bioinformatic analyses.

**File Name: Supplementary Data 2**

**Description:** Long ncRNAs significantly enriched at chromatin.

**File Name: Supplementary Data 3**

**Description:** Long ncRNAs significantly enriched in the nucleoplasm.
